# Supplementary material for: RNA-Seq Characterization of Spinal Cord Injury Transcriptome in Acute/Subacute Phases: A Resource for Understanding the Pathology at the Systems Level
Source: PLoS One. 2013 Aug 9;8(8):e72567. doi: 10.1371/journal.pone.0072567 (PMC3739761; doi:10.1371/journal.pone.0072567)
Supplement: Table S6 — Genes of interest identified from network constructed with up-regulated genes in subacute SCI (7D). Genes were listed in the order of their Relevance Index number. RI = abs(log(Fold change)) *(Connection number). (XLSX) [file pone.0072567.s006.xlsx]

## Sheet: Sheet1
Symbol	Fold_Change	Location	Family	Drugs	Index_of_Relevance
TNF	16.6038	Extracellular Space	cytokine	Y	689.086
CCL13	52.6494	Extracellular Space	cytokine		474.623
IL1B	8.04913	Extracellular Space	cytokine	Y	339.998
CCL3L1/CCL3L3	41.4298	Extracellular Space	cytokine		333.101
CCL4	66.9011	Extracellular Space	cytokine		236.494
CD36	547.502	Plasma Membrane	transmembrane receptor		218.321
STAT6	8.07571	Nucleus	transcription regulator		189.856
APOE	16.0334	Extracellular Space	transporter		188.141
SPI1	23.7281	Nucleus	transcription regulator		178.172
CD28	35.858	Plasma Membrane	transmembrane receptor		175.584
SPP1	112.577	Extracellular Space	cytokine		170.369
CEBPB	13.043	Nucleus	transcription regulator		159.324
CYBB	93.0623	Cytoplasm	enzyme		156.963
C5AR1	69.1494	Plasma Membrane	G-protein coupled receptor		152.791
CXCL10	10.5386	Extracellular Space	cytokine	Y	149.495
MSR1	212.083	Plasma Membrane	transmembrane receptor		139.113
TIMP1	77.2108	Extracellular Space	other		125.415
HMOX1	51.4766	Cytoplasm	enzyme	Y	125.089
SERPINE1	34.7251	Extracellular Space	other	Y	122.83
MYD88	4.60766	Plasma Membrane	other		114.61
FCGR2B	34.8563	Plasma Membrane	transmembrane receptor		112.714
MMP13	60.3494	Extracellular Space	peptidase		112.39
IL1RN	46.9843	Extracellular Space	cytokine		111.082
TP53	2.66902	Nucleus	transcription regulator		110.472
CD22	89.3859	Plasma Membrane	transmembrane receptor	Y	110.194
ACP5	229.504	Cytoplasm	phosphatase		109.793
CXCL2	2.9164	Extracellular Space	cytokine		108.093
ITGB2	41.7582	Plasma Membrane	transmembrane receptor		107.68
BTK	24.8966	Cytoplasm	kinase		106.671
FCER1G	47.9996	Plasma Membrane	transmembrane receptor		106.114
PPARG	4.60335	Nucleus	ligand-dependent nuclear receptor	Y	101.323
INPP5D	13.2342	Cytoplasm	phosphatase		100.608
VAV1	14.8282	Nucleus	transcription regulator		97.2568
LPL	41.6452	Cytoplasm	enzyme	Y	96.8414
PTPRC	20.9258	Plasma Membrane	phosphatase		96.5186
FABP4	41.0779	Cytoplasm	transporter		96.4852
PTPN6	17.8858	Cytoplasm	phosphatase		95.697
ARG1	232.142	Cytoplasm	enzyme		94.3064
CCR1	25.0562	Plasma Membrane	G-protein coupled receptor		92.9419
RAC2	24.729	Cytoplasm	enzyme		92.5627
MMP12	191.279	Extracellular Space	peptidase		90.9544
IL7R	61.5941	Plasma Membrane	transmembrane receptor	Y	89.1708
CCL11	11.4965	Extracellular Space	cytokine		88.0779
OSM	24.8287	Extracellular Space	cytokine		88.0448
LILRB3	54.2368	Plasma Membrane	transmembrane receptor		86.418
SOCS1	4.06732	Cytoplasm	other		82.9872
JUN	2.9316	Nucleus	transcription regulator		82.2395
ABCA1	20.02	Plasma Membrane	transporter		82.1441
Ifi204 (includes others)	77.0835	Nucleus	transcription regulator		81.4886
PLAU	76.733	Extracellular Space	peptidase		81.4031
BCL2A1	85.7761	Cytoplasm	other		77.07
CSF2RB	41.997	Plasma Membrane	transmembrane receptor	Y	75.491
CSF1	2.48639	Extracellular Space	cytokine		74.9009
LCN2	24.285	Extracellular Space	transporter		73.6319
CCL7	36.5697	Extracellular Space	cytokine		72.6961
ATF3	86.5678	Nucleus	transcription regulator		70.7933
C3AR1	79.5761	Plasma Membrane	G-protein coupled receptor		69.4569
LGALS3	118.402	Extracellular Space	other		68.8755
FCGR2A	19.64	Plasma Membrane	transmembrane receptor		68.7316
RGS1	186.115	Plasma Membrane	other		67.8605
PTX3	25.4392	Extracellular Space	other		65.3658
C1QA	30.6394	Extracellular Space	other		64.1851
CASP3	3.08155	Cytoplasm	peptidase	Y	63.3226
IL23A	6.10703	Extracellular Space	cytokine		62.6513
BLNK	34.654	Cytoplasm	other		61.3794
BCL3	20.2733	Nucleus	transcription regulator		60.7811
CLEC7A	104.956	Plasma Membrane	transmembrane receptor		60.4228
CCR5	4.4319	Plasma Membrane	G-protein coupled receptor	Y	60.1419
CTSS	24.066	Cytoplasm	peptidase		59.656
Lyz1/Lyz2	345.644	Cytoplasm	enzyme		59.032
LDLR	0.270068	Plasma Membrane	transporter		58.5467
Gp49a/Lilrb4	325.002	unknown	other		58.4101
PLAUR	35.9762	Plasma Membrane	transmembrane receptor		56.8587
FGR	20.4437	Nucleus	kinase	Y	56.5966
IL15	4.23952	Extracellular Space	cytokine		56.2653
RUNX1	25.2363	Nucleus	transcription regulator		55.8891
LAT2	24.3611	Plasma Membrane	other		55.2781
LCP2	23.4371	Cytoplasm	other		54.6087
C3	3.13756	Extracellular Space	peptidase		54.4382
HCK	11.7106	Cytoplasm	kinase	Y	53.2462
CDKN1A	2.77809	Nucleus	kinase		53.0674
PRDM1	7.86536	Nucleus	transcription regulator		50.5837
STAT4	3.09436	Nucleus	transcription regulator		50.5189
THBS1	23.3007	Extracellular Space	other		49.9653
LGALS1	11.6146	Extracellular Space	other		49.5302
IL2RG	20.5494	Plasma Membrane	transmembrane receptor	Y	47.9713
ITGAL	20.4498	Plasma Membrane	transmembrane receptor	Y	47.8942
CD68	114.411	Plasma Membrane	other		47.8666
NFATC1	4.20947	Nucleus	transcription regulator		47.6937
STAT5A	2.26126	Nucleus	transcription regulator		44.7308
TYROBP	46.9552	Plasma Membrane	transmembrane receptor		44.4257
CD72	80.444	Plasma Membrane	transmembrane receptor		44.3094
ITGA5	30.2026	Plasma Membrane	transmembrane receptor		44.2494
IRF7	5.45256	Nucleus	transcription regulator		44.0448
CXCR4	19.4909	Plasma Membrane	G-protein coupled receptor	Y	42.8473
MMP14	14.8596	Extracellular Space	peptidase		42.8266
NR1H3	3.34195	Nucleus	ligand-dependent nuclear receptor		41.7765
EMR1	37.2984	Plasma Membrane	G-protein coupled receptor		41.7683
PTK2B	6.72663	Cytoplasm	kinase		41.2483
CD48	108.932	Plasma Membrane	other		40.6037
MMP8	55.4399	Extracellular Space	peptidase		40.55
Ccnb1/Gm5593	54.999	Nucleus	other		40.4693
DNASE2	22.1845	Cytoplasm	enzyme		40.2433
CD200R1	52.5832	Plasma Membrane	other		40.0157
CD180	31.9467	Plasma Membrane	other		39.9807
TLR7	30.289	Plasma Membrane	transmembrane receptor	Y	39.3658
CTSC	20.7111	Cytoplasm	peptidase		39.351
CARD11	20.0048	Cytoplasm	kinase		38.9005
TREM2	43.5618	Plasma Membrane	transmembrane receptor		38.1149
IFNGR1	4.25902	Plasma Membrane	transmembrane receptor	Y	37.6294
CTSD	38.9669	Cytoplasm	peptidase		36.9893
ANXA1	24.5983	Plasma Membrane	other		36.9639
MAPKAPK2	3.03043	Nucleus	kinase		36.789
ESR1	0.415663	Nucleus	ligand-dependent nuclear receptor	Y	36.7289
ALOX5	12.4157	Cytoplasm	enzyme	Y	36.3409
CD244	12.3804	Plasma Membrane	transmembrane receptor		36.2999
MERTK	5.97448	Plasma Membrane	kinase		36.1034
PLIN2	34.7198	Plasma Membrane	other		35.8238
S100A4	21.8306	Cytoplasm	other		35.5862
CD74	12.9311	Plasma Membrane	transmembrane receptor		33.2349
TNFAIP2	26.0863	Extracellular Space	other		32.9365
CNR2	25.3153	Plasma Membrane	G-protein coupled receptor	Y	32.6336
SCD	0.343049	Cytoplasm	enzyme		32.4138
SCGB1A1	24.4294	Extracellular Space	cytokine		32.2738
USP18	5.51515	Cytoplasm	peptidase		32.0242
PIM1	2.86276	Cytoplasm	kinase		30.3481
CLEC6A	64.0728	Plasma Membrane	transmembrane receptor		30.0082
GRN	29.9667	Extracellular Space	growth factor		29.4317
LSP1	29.854	Cytoplasm	other		29.3991
CXCL9	2.38101	Extracellular Space	cytokine		28.7861
PPARA	0.494336	Nucleus	ligand-dependent nuclear receptor	Y	28.4602
LBP	16.3107	Plasma Membrane	transporter		28.1942
CH25H	125.712	Cytoplasm	enzyme		27.8959
HCST	43.2327	Plasma Membrane	transmembrane receptor		27.1702
ZFP36	5.52423	Nucleus	transcription regulator		27.1235
Ctla2a/Ctla2b	39.0105	Plasma Membrane	other		26.4289
NR3C2	0.273637	Nucleus	ligand-dependent nuclear receptor	Y	26.1753
ITGAX	83.2517	Plasma Membrane	transmembrane receptor		25.5176
LOX	34.2793	Extracellular Space	enzyme		25.4963
SLPI	5.6591	Cytoplasm	other		25.0057
SIRPA	3.78513	Plasma Membrane	phosphatase		24.9644
ZC3H12A	4.14558	Cytoplasm	other		24.6189
SLC4A1	11.2877	Plasma Membrane	transporter		24.4767
ATP6V0D2	265.215	Cytoplasm	transporter		24.1531
BATF	27.99	Nucleus	transcription regulator		24.0342
MKI67	60.6262	Nucleus	other		23.6875
IRF3	2.10465	Nucleus	transcription regulator		23.6187
Chi3l3/Chi3l4	54.0253	Extracellular Space	enzyme		23.0223
GATA1	2.84003	Nucleus	transcription regulator		22.5886
XIST	183.381	Nucleus	other		22.5561
HAVCR2	22.4195	Plasma Membrane	other		22.4334
TREM1	3.29966	Plasma Membrane	transmembrane receptor		22.3901
PF4	47.4207	Extracellular Space	cytokine		22.2698
AQP1	45.3392	Plasma Membrane	transporter		22.0107
CARD9	8.77414	Cytoplasm	other		21.9328
TK1	44.6385	Cytoplasm	kinase		21.9209
CTSZ	20.7213	Cytoplasm	peptidase		21.8652
CASP6	4.49824	Cytoplasm	peptidase		21.6936
IFI30	35.3839	Cytoplasm	enzyme		20.5801
POSTN	112.755	Extracellular Space	other		20.4511
APOBEC1	33.9773	Cytoplasm	enzyme		20.346
C1QB	33.0379	Extracellular Space	other		20.1842
CST7	92.3722	Extracellular Space	other		19.5882
PSEN2	2.46039	Cytoplasm	peptidase	Y	19.4833
Gbp2	3.07393	unknown	enzyme		19.441
GRIP1	0.243548	Plasma Membrane	transcription regulator		18.3395
CX3CR1	4.77282	Plasma Membrane	G-protein coupled receptor		18.0387
PXN	2.43988	Cytoplasm	other		18.0153
UBE2C	60.599	Cytoplasm	enzyme		17.7637
ETS1	2.23916	Nucleus	transcription regulator		17.4444
IRG1	3.33311	unknown	other		17.3687
TLR1	20.19	Plasma Membrane	transmembrane receptor		17.3423
CD300LD	54.4141	Plasma Membrane	other		17.2977
LUM	19.7843	Extracellular Space	other		17.2251
MPEG1	51.2901	Cytoplasm	other		17.0418
PSME2	47.1816	Cytoplasm	peptidase		16.6805
ABCG1	2.55138	Plasma Membrane	transporter		16.2153
Tlr13	41.7783	Cytoplasm	other		16.154
IFIH1	3.06264	Nucleus	enzyme		16.1477
CAPG	39.8206	Nucleus	other		15.9463
C1QC	38.4885	Extracellular Space	other		15.7991
IL27RA	3.70372	Plasma Membrane	transmembrane receptor		15.1118
OAS1	8.0522	Cytoplasm	enzyme		15.0469
GUSB	27.1852	Cytoplasm	enzyme		14.2943
Retnla	0.379226	Extracellular Space	other		13.9887
APOC4	118.298	Extracellular Space	transporter		13.7726
BST2	23.4981	Plasma Membrane	other		13.6634
SCN10A	22.5779	Plasma Membrane	ion channel	Y	13.4905
PTGER4	2.33927	Plasma Membrane	G-protein coupled receptor	Y	13.4866
SERPINA3	22.535	Extracellular Space	other		13.4823
EMP1	22.092	Plasma Membrane	other		13.3964
P2RY6	20.1286	Plasma Membrane	G-protein coupled receptor		12.9935
FBLN2	19.8712	Extracellular Space	other		12.9378
FBN1	9.38812	Extracellular Space	other		12.9233
ADAM8	81.4526	Plasma Membrane	peptidase		12.6958
BST1	61.37	Plasma Membrane	enzyme		11.8789
AEBP1	2.25548	Nucleus	peptidase		11.7344
HRH2	0.313347	Plasma Membrane	G-protein coupled receptor	Y	11.7192
STAB1	55.087	Plasma Membrane	transporter		11.5673
PLAC8	49.8444	Nucleus	other		11.2787
TLR8	47.1413	Plasma Membrane	transmembrane receptor	Y	11.1178
PLBD1	41.9357	Extracellular Space	other		10.7802
F13A1	40.2322	Extracellular Space	enzyme		10.6606
S100A11	32.2637	Cytoplasm	other		10.0237
FTL	30.4817	Cytoplasm	enzyme		9.85974
LRRC17	26.7084	Extracellular Space	other		9.47845
FAM26F	24.2815	unknown	other		9.20357
COL6A3	22.4126	Extracellular Space	other	Y	8.97248
CD5L	461.709	Plasma Membrane	transmembrane receptor		8.85084
NCF2	21.4278	Cytoplasm	enzyme		8.84282
GDF15	160.789	Extracellular Space	growth factor		7.32903
GPR65	94.7965	Plasma Membrane	G-protein coupled receptor		6.56676
MS4A6A	80.9235	unknown	other		6.33849
Saa3	66.2492	unknown	other		6.04983
UGT1A6	54.6969	Cytoplasm	enzyme		5.77339
Fcrls	34.3581	Plasma Membrane	other		5.10258
PTPN7	32.7808	Cytoplasm	phosphatase		5.03478
KCNN4	32.081	Plasma Membrane	ion channel	Y	5.00365
GDF3	28.6536	Extracellular Space	growth factor		4.84064
AVIL	26.9268	Cytoplasm	other		4.75097
MXD3	22.2924	Nucleus	transcription regulator		4.47848
RPL24	21.7933	Cytoplasm	other		4.44581
FZD2	3.87589	Plasma Membrane	G-protein coupled receptor		1.95453
