# Supplementary material for: RNA-Seq Characterization of Spinal Cord Injury Transcriptome in Acute/Subacute Phases: A Resource for Understanding the Pathology at the Systems Level
Source: PLoS One. 2013 Aug 9;8(8):e72567. doi: 10.1371/journal.pone.0072567 (PMC3739761; doi:10.1371/journal.pone.0072567)
Supplement: Table S7 — Genes of interest identified from network constructed with down-regulated genes in subacute SCI (7D). Genes were listed in the order of their Relevance Index number. RI = abs(log(Fold change)) *(Connection number). (XLSX) [file pone.0072567.s007.xlsx]

## Sheet: Sheet1
Symbol	Fold Change	Location	Family	Drugs	Index_of_Relevance
TNF	15.0111	Extracellular Space	cytokine	Y	183.674
IL1B	8.61617	Extracellular Space	cytokine	Y	102.533
CD28	33.7667	Plasma Membrane	transmembrane receptor		81.2405
NFE2L2	4.46531	Nucleus	transcription regulator		62.6041
DRD2	0.13608	Plasma Membrane	G-protein coupled receptor	Y	57.5494
CXCL10	10.3255	Extracellular Space	cytokine	Y	57.2584
MYC	4.81674	Nucleus	transcription regulator		49.8973
GRIN1	0.150534	Plasma Membrane	ion channel	Y	40.9775
IL23A	5.55436	Extracellular Space	cytokine		39.5779
TGFBR2	6.72233	Plasma Membrane	kinase		38.4855
DLG4	0.303376	Plasma Membrane	kinase		37.858
CD44	6.92015	Plasma Membrane	enzyme		36.2804
CASP3	3.0344	Cytoplasm	peptidase	Y	35.231
MYD88	4.4721	Plasma Membrane	other		30.2533
SNAP25	0.155128	Plasma Membrane	transporter	Y	29.5732
NPY	3.49029	Extracellular Space	other		28.8535
SYP	0.216117	Cytoplasm	transporter		28.7315
NEUROD1	0.182701	Nucleus	transcription regulator		26.9769
GRIN2A	0.21575	Plasma Membrane	ion channel	Y	26.5508
REL	3.15018	Nucleus	transcription regulator		26.487
ACHE	0.282341	Plasma Membrane	enzyme	Y	25.5428
PCSK2	0.148239	Extracellular Space	peptidase		24.786
NTRK1	4.73099	Plasma Membrane	kinase	Y	24.6636
AR	0.158598	Nucleus	ligand-dependent nuclear receptor	Y	23.909
CAMK2A	0.22335	Cytoplasm	kinase		23.7889
OPRD1	0.123033	Plasma Membrane	G-protein coupled receptor	Y	21.1602
GRIN2B	0.371553	Plasma Membrane	ion channel	Y	19.997
HSD11B1	0.101481	Cytoplasm	enzyme		19.8043
NGFR	4.44992	Plasma Membrane	transmembrane receptor		19.384
PGR	0.17169	Nucleus	ligand-dependent nuclear receptor	Y	17.7948
PCSK1	0.358814	Extracellular Space	peptidase		17.7443
SLC18A3	0.227582	Plasma Membrane	transporter		17.0843
SLC30A3	0.28802	Plasma Membrane	transporter		16.1618
PTK2B	6.34816	Cytoplasm	kinase		15.998
GRIA1	0.399206	Plasma Membrane	ion channel	Y	15.8975
STXBP1	0.162251	Cytoplasm	transporter		15.7422
CHRM3	0.170339	Plasma Membrane	G-protein coupled receptor	Y	15.3211
HOXA10	0.172025	Nucleus	transcription regulator		15.2359
CNTNAP2	0.175607	Plasma Membrane	other		15.0575
CHRM2	0.0759343	Plasma Membrane	G-protein coupled receptor	Y	14.8764
GRM1	0.129073	Plasma Membrane	G-protein coupled receptor	Y	14.7687
SYT1	0.188812	Cytoplasm	transporter		14.4298
KCNA2	0.141446	Plasma Membrane	ion channel		14.1084
CHAT	0.145488	Nucleus	enzyme		13.9051
MAPK10	0.208762	Cytoplasm	kinase		13.5604
ADCY1	0.167483	Plasma Membrane	enzyme		12.8896
CHRNA7	0.171673	Plasma Membrane	transmembrane receptor	Y	12.7113
SLC6A5	0.113285	Plasma Membrane	transporter		12.5679
SSTR3	0.176852	Plasma Membrane	G-protein coupled receptor	Y	12.4969
VSNL1	0.121382	Cytoplasm	other		12.1695
GABRA1	0.197691	Plasma Membrane	ion channel	Y	11.6934
IRF3	2.07235	Nucleus	transcription regulator		11.564
HOXD10	0.14279	Nucleus	transcription regulator		11.2321
NEUROD2	0.14384	Nucleus	transcription regulator		11.1898
HTR2C	0.14756	Plasma Membrane	G-protein coupled receptor	Y	11.0425
PRKACA	0.479641	Cytoplasm	kinase		10.5997
HPCA	0.161222	Cytoplasm	other		10.5315
HTR6	0.164325	Plasma Membrane	G-protein coupled receptor	Y	10.4215
ATP1A3	0.166556	Plasma Membrane	transporter	Y	10.3437
MECP2	0.450958	Nucleus	transcription regulator		10.3404
GABRG2	0.168688	Plasma Membrane	ion channel	Y	10.2703
PAX8	0.170478	Nucleus	transcription regulator		10.2094
CALB1	0.171944	Cytoplasm	other		10.16
SSTR2	0.181091	Plasma Membrane	G-protein coupled receptor	Y	9.86086
HES5	0.103543	Nucleus	other		9.81511
PTGER4	2.23932	Plasma Membrane	G-protein coupled receptor	Y	9.30451
HTR2A	0.212692	Plasma Membrane	G-protein coupled receptor	Y	8.93264
DLG2	0.223254	Plasma Membrane	kinase		8.65298
OPRK1	0.145138	Plasma Membrane	G-protein coupled receptor	Y	8.35349
NPY5R	0.154637	Plasma Membrane	G-protein coupled receptor		8.07913
SLC5A7	0.155567	Plasma Membrane	transporter		8.05318
GJD2	0.156309	Plasma Membrane	transporter		8.03259
Camk2b	0.163849	Cytoplasm	kinase		7.82867
GRM5	0.166587	Plasma Membrane	G-protein coupled receptor	Y	7.75696
CALB2	0.173238	Cytoplasm	other		7.58753
PDYN	0.438973	Extracellular Space	transporter		7.12677
CYP11A1	0.45054	Cytoplasm	enzyme		6.90163
SCN4B	0.0921887	Plasma Membrane	ion channel	Y	6.87853
ATP2B3	0.105019	Plasma Membrane	transporter		6.50255
Skor1	0.120029	Nucleus	transcription regulator		6.1171
KIF3A	0.435259	Cytoplasm	enzyme		6.00027
CNTN2	0.437383	Plasma Membrane	other		5.96516
STX1B	0.129825	Plasma Membrane	ion channel		5.89073
ATP2B2	0.137667	Plasma Membrane	transporter		5.72148
GABBR2	0.138493	Plasma Membrane	G-protein coupled receptor	Y	5.70422
GABRB2	0.142246	Plasma Membrane	ion channel	Y	5.62708
INA	0.142359	Cytoplasm	other		5.62479
VSTM2A	0.142774	Extracellular Space	other		5.61639
PTGER2	2.57758	Plasma Membrane	G-protein coupled receptor	Y	5.46407
OPRL1	0.150628	Plasma Membrane	G-protein coupled receptor	Y	5.46187
NPTX1	0.151224	Extracellular Space	other		5.45048
SV2B	0.151605	Plasma Membrane	transporter		5.44322
KIF5A	0.153444	Cytoplasm	transporter		5.40844
PAX2	0.156813	Nucleus	transcription regulator		5.34576
KIF5B	0.405597	Cytoplasm	other		5.20752
DRD5	0.166908	Plasma Membrane	G-protein coupled receptor	Y	5.16575
KCNAB1	0.168893	Plasma Membrane	ion channel		5.13163
NAPB	0.170103	Cytoplasm	transporter		5.11104
MAB21L1	0.17382	Nucleus	other		5.04866
CLEC10A	5.63033	Plasma Membrane	other		4.98644
FGF13	0.324278	Extracellular Space	growth factor		4.87409
ADRBK2	0.331398	Cytoplasm	kinase		4.78009
DYNC1I1	0.192866	Cytoplasm	other		4.74866
KCNAB2	0.200261	Plasma Membrane	ion channel		4.64009
NSF	0.207897	Cytoplasm	transporter		4.53211
HOXD9	0.228578	Nucleus	transcription regulator		4.25848
PNOC	0.494086	Extracellular Space	other		4.06866
TTC3	0.283662	Cytoplasm	enzyme		3.63551
CACNG2	0.0856164	Plasma Membrane	ion channel		3.54597
EPB41L2	2.24789	Plasma Membrane	other		3.50571
KLC1	0.451383	Cytoplasm	other		3.44273
HAPLN1	0.100116	Extracellular Space	other		3.32026
SLC12A5	0.123558	Plasma Membrane	transporter	Y	3.01674
NAT8L	0.125331	Cytoplasm	enzyme		2.99619
RIMS1	0.134338	Plasma Membrane	other		2.89606
GRM8	0.134626	Plasma Membrane	G-protein coupled receptor	Y	2.89297
NECAB3	0.144214	Cytoplasm	other		2.79372
DGKK	0.156748	Cytoplasm	kinase		2.67348
FAIM2	0.161486	Plasma Membrane	other		2.63052
GRIN3B	0.165274	Plasma Membrane	ion channel	Y	2.59707
CAMKV	0.16893	unknown	kinase		2.5655
PRKAR2B	0.472477	Cytoplasm	kinase		2.16337
DLGAP1	0.348531	Plasma Membrane	other		1.52064
DLG3	0.46224	Plasma Membrane	kinase		1.11329
APPBP2	0.480525	Cytoplasm	other		1.05732
GRIK2	0.494155	Plasma Membrane	ion channel		1.01696
SYNGAP1		Plasma Membrane	other
